# Supplementary material for: Prognostic value of desmoplastic reaction characterisation in stage II colon cancer: prospective validation in a Phase 3 study (SACURA Trial)
Source: PubMed Central journal article supplement (PMC7960987; doi:10.1038/s41416-020-01222-8), 2021-01-07
Supplement: 41416_2020_1222_MOESM1_ESM.pdf [file 41416_2020_1222_MOESM1_ESM.pdf]

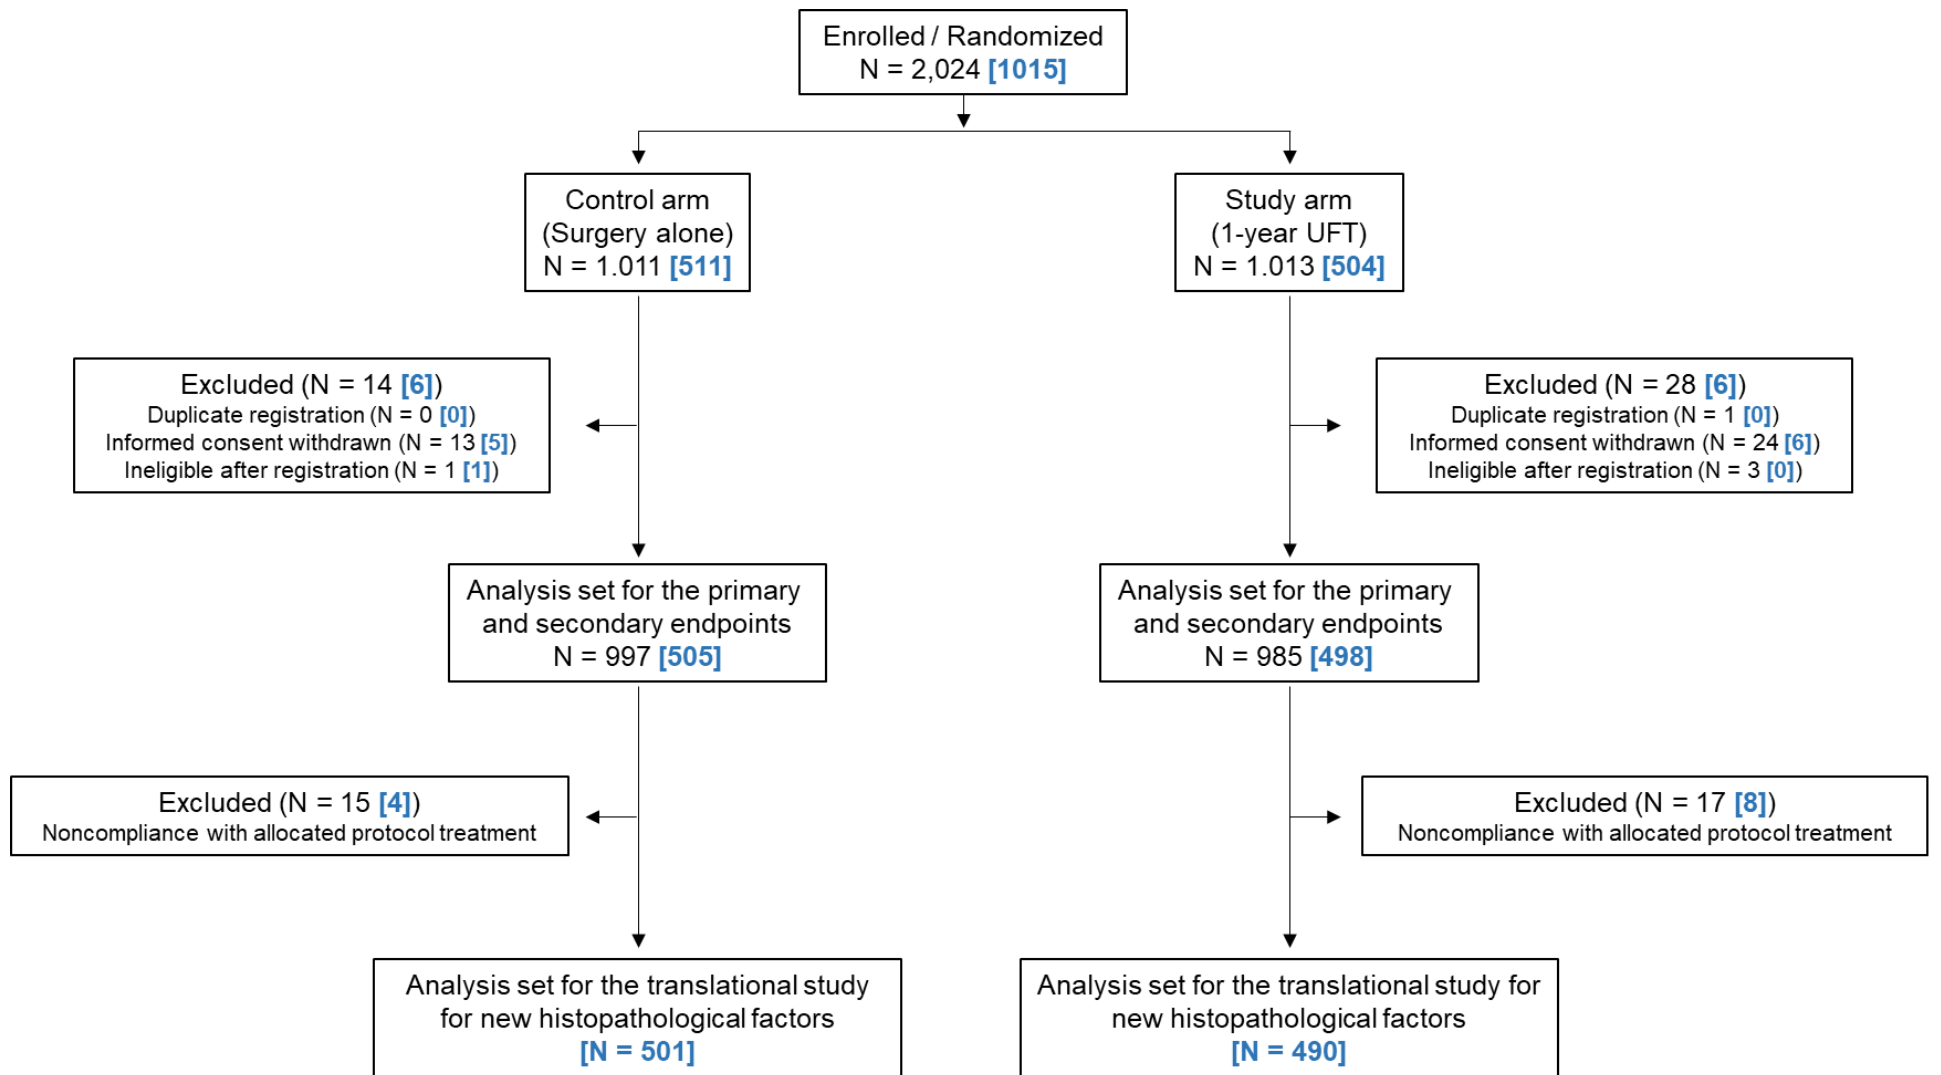

[ ]: number of patients in the translational study for new histopathological factors

Supplemental Figure 1. CONSORT diagram

## A) Mature

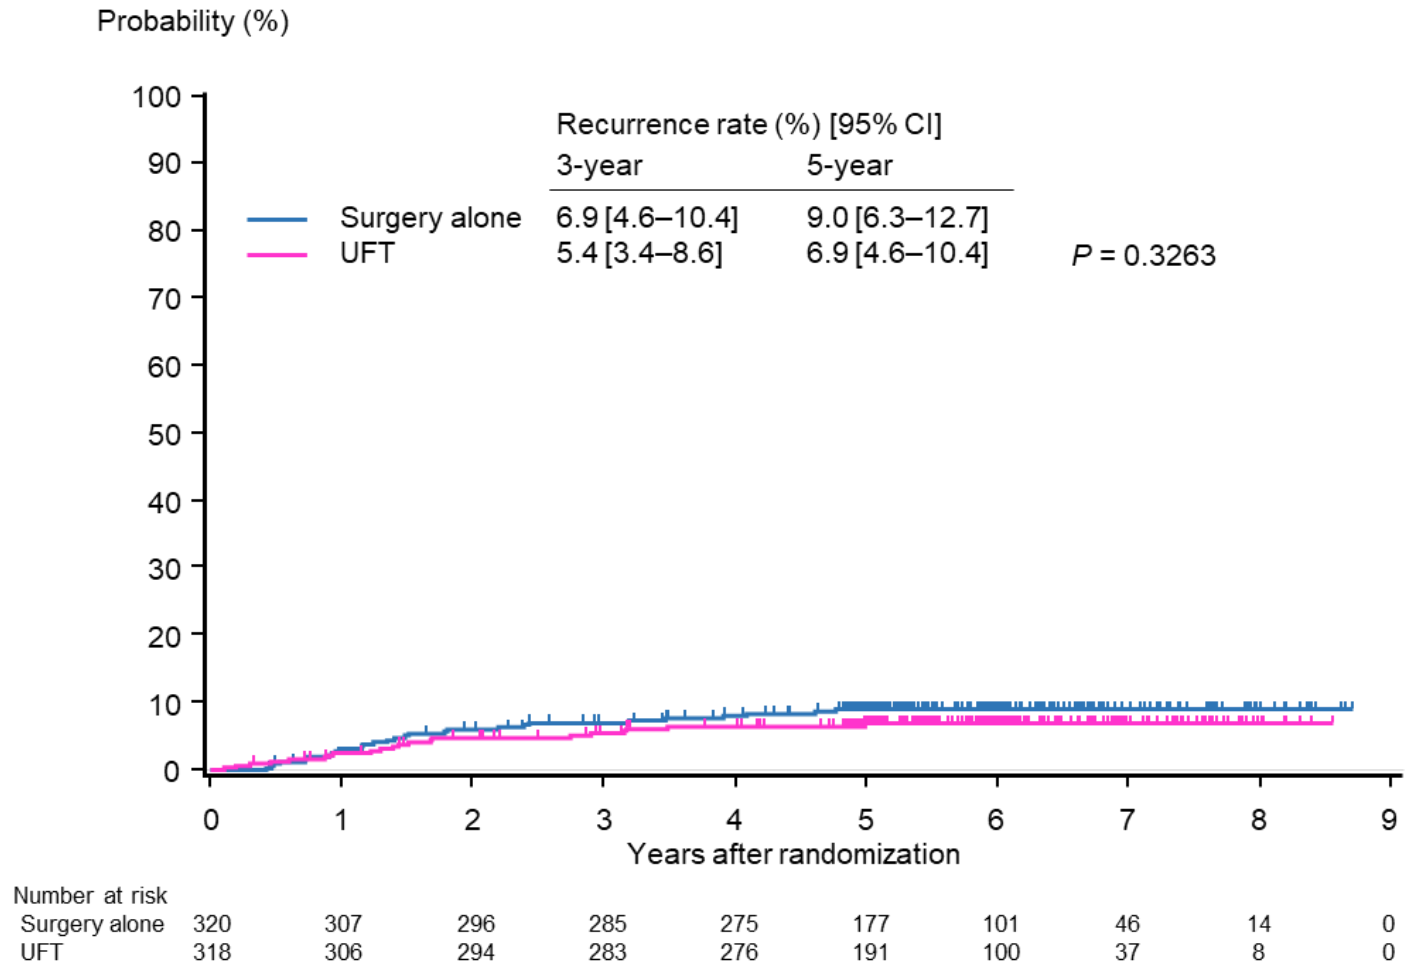

## B) non-Mature

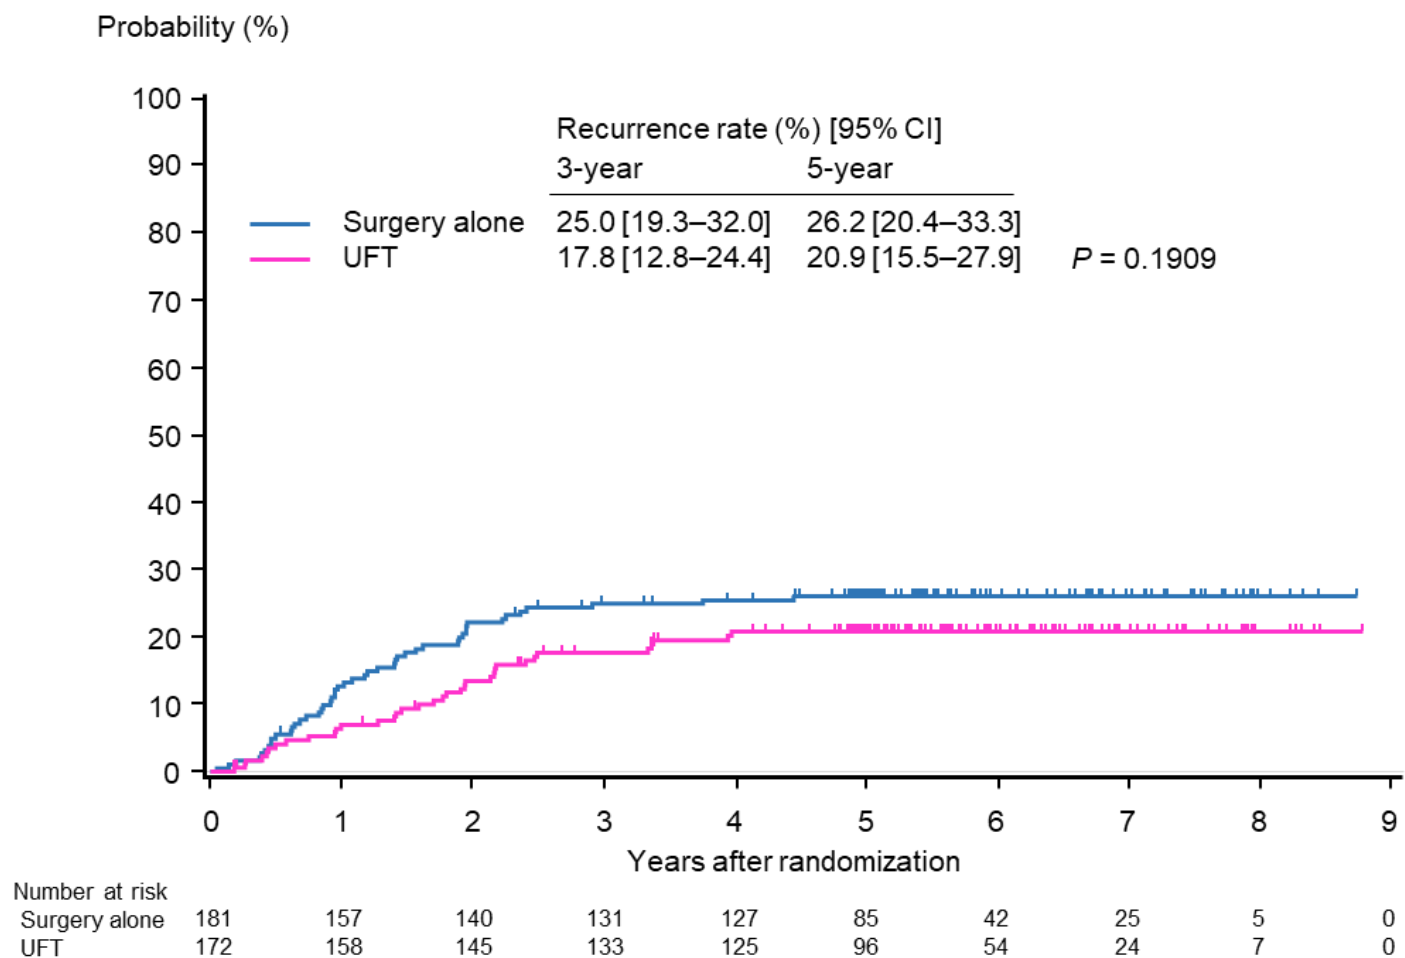

**Supplemental Figure 2. Comparison of time to recurrence between the surgery-alone group and the chemotherapy group in A) patients with tumors classified as Mature pattern and B) those with tumors classified as non-Mature pattern.**

The 5-year recurrence rates (95% CI) for surgery-alone and the UFT groups were 9.0% (6.3%–12.7%) and 6.9% (4.6%–10.4%) in the Mature group and 26.2% (20.4%–33.3%) and 20.9% (15.5%–27.9%) in the non-Mature group, respectively. UFT, tegafur–uracil

## Supplemental Table 1.

A list of institutions that participated in the translational study for new histopathological prognostic factors in the SACURA trial

|                                                                           |                                                           |                                                                    |
|---------------------------------------------------------------------------|-----------------------------------------------------------|--------------------------------------------------------------------|
| 1. Osaka General Medical Center                                           | 42. Osaka City General Hospital                           | 83. Gunma University Graduate School of Medicine                   |
| 2. National Defense Medical College                                       | 43. Higashi Takarazuka Satoh Hospital                     | 84. Nagahama City Hospital                                         |
| 3. Kobe City Hospital Organization Kobe City Medical Center West Hospital | 44. Tokyo Yamate Medical Center                           | 85. Shinshu University Hospital                                    |
| 4. Koseiren Takaoka Hospital                                              | 45. Takarazuka City Hospital                              | 86. Japanese Red Cross Society Nagano Hospital                     |
| 5. Hamamatsu University School of Medicine                                | 46. Kurashiki Central Hospital                            | 87. Tottori University Hospital                                    |
| 6. Saiseikai Yokohamashi Tobu Hospital                                    | 47. kurume university school of medicine                  | 88. Kyoritsu General hospital                                      |
| 7. Tokyo Medical and Dental University                                    | 48. Hakodate Municipal Hospital                           | 89. Saitama Medical University International Medical Center        |
| 8. JCHO Osaka Hospital                                                    | 49. Tochigi Cancer Center                                 | 90. Numazu City Hospital                                           |
| 9. Suita Municipal Hospital                                               | 50. Kitakyushu Municipal Medical Center                   | 91. Nishijin Hospital                                              |
| 10. Japanese Red Cross Kyoto Daini Hospital                               | 51. Hashima City Hospital                                 | 92. Shizuoka City Shizuoka Hospital                                |
| 11. Nippon Medical School Chiba Hokusoh Hospital                          | 52. Kure Medical Center and Chugoku Cancer Center         | 93. Fujita Health University Banbuntane Hotokukai Hospital         |
| 12. Shizuoka City Shimizu Hospital                                        | 53. Hokushin General Hospital                             | 94. Hokkaido chuo rosai hospital                                   |
| 13. Sano Hospital                                                         | 54. Miyagi Cancer Center                                  | 95. Heisei Yokohama Hospital                                       |
| 14. Saiseikai Tondabayashi Hospital                                       | 55. Yamagata University Hospital                          | 96. Iida Municipal Hospital                                        |
| 15. Fukui-ken Saiseikai Hospital                                          | 56. Yamaguchi University Graduate School of Medicine      | 97. Gifu City Hospital                                             |
| 16. National Hospital Organization Kyoto Medical Center                   | 57. Oita University Graduate School of Medicine           | 98. Hiraka General Hospital                                        |
| 17. St. Mary's Hospital                                                   | 58. Nagano Municipal Hospital                             | 99. Tokyo Women's Medical University Hospital                      |
| 18. Sakai City Medical Center                                             | 59. Shimonoseki Medical Center                            | 100. University of Fukui Hospital                                  |
| 19. Ogaki Municipal Hospital                                              | 60. Himeji St. Mary's Hospital                            | 101. Midori Municipal Hospital                                     |
| 20. Tokyo Metropolitan Tama Medical Center                                | 61. Nagoya Ekisaiikai Hospital                            | 102. Kawakita General Hospital                                     |
| 21. Social Insurance Tagawa Hospital                                      | 62. Tokushima University Hospital                         | 103. Chigasaki Municipal Hospital                                  |
| 22. Chugoku Central Hospital                                              | 63. Anan Kyoei Hospital                                   | 104. Minamiosaka Hospital                                          |
| 23. Teikyo University School of Medicine                                  | 64. Kumamoto University                                   | 105. Saiseikai Hiroshima Hospital                                  |
| 24. National Hospital Organization Kobe Medical Center                    | 65. National Hospital Organization Shikoku Cancer Center  | 106. Kobe City Nishi-Kobe Medical Center                           |
| 25. Hakodate Goryoukaku Hospital                                          | 66. Kanagawa Cancer Center                                | 107. Nanpuh Hospital                                               |
| 26. Gunma Prefectural Cancer Center                                       | 67. Matsunami General Hospital                            | 108. Noshiro Kousei Medical Center                                 |
| 27. Hyogo College of Medicine                                             | 68. Otemae Hospital                                       | 109. Niigata University Medical & Dental Hospital                  |
| 28. Kagawa Prefectural Central Hospital                                   | 69. Japanese Red Cross Osaka Hospital                     | 110. Hoshigaoka Medical Center                                     |
| 29. International Goodwill Hospital                                       | 70. Hyogo Cancer Center                                   | 111. Almeida Memorial Hospital                                     |
| 30. Kobe University Graduate School of Medicine                           | 71. Aichi Cancer Center Aichi Hospital                    | 112. Kagawa Rosai Hospital                                         |
| 31. Rinku General Medical Center                                          | 72. University of Yamanashi Hospital                      | 113. Japanese Red Cross Wakayama Medical Center                    |
| 32. Kyorin University                                                     | 73. Jichi Medical University Hospital                     | 114. Kansai Medical University Medical Center                      |
| 33. Niigata Cancer Center Hospital                                        | 74. Otsu City Hospital                                    | 115. Saitama Medical Center                                        |
| 34. Osaka Police Hospital                                                 | 75. Oita Red Cross Hospital                               | 116. Himeji Central Hospital                                       |
| 35. Kansai Rosai Hospital                                                 | 76. Teikyo University Chiba Medical Center                | 117. Katsushika Edogawa Hospital                                   |
| 36. National Center for Global Health and Medicine                        | 77. Tohoku Rosai Hospital                                 | 118. Matsuda Hospital                                              |
| 37. Fukushima Medical University                                          | 78. Kitasato University East Hospital                     | 119. International University of Health and Welfare, Mita Hospital |
| 38. Osaka Rosai Hospital                                                  | 79. Minoh City Hospital                                   | 120. National Hospital Organization Kumamoto Minami Hospital       |
| 39. Sapporo Medical University                                            | 80. Asahikawa Medical University                          | 121. Saitama Medical Center                                        |
| 40. Miyoshi Central Hospital                                              | 81. Kyushu University Graduate School of Medical Sciences | 122. Ishikawa Prefectural Central Hospital                         |
| 41. Nagoya University Hospital                                            | 82. Nissay Hospital                                       | 123. Saiseikai Nara Hospital                                       |

**Supplemental Table 2.**

The incidence of postoperative oncological events according to the DR pattern

| Oncological event    | Organ of recurrence            | DR pattern     |                   |                 | P value |
|----------------------|--------------------------------|----------------|-------------------|-----------------|---------|
|                      |                                | Mature (N=638) | Intermed. (N=294) | Immature (N=59) |         |
| <b>Recurrence</b>    | Overall                        | 49 ( 7.7)      | 63 (21.4)         | 19 (32.2)       | <0.0001 |
|                      | <i>Liver</i>                   | 27 ( 4.2)      | 29 ( 9.9)         | 4 ( 6.8)        | 0.0035  |
|                      | <i>Lung</i>                    | 13 ( 2.0)      | 14 ( 4.8)         | 10 (16.9)       | <0.0001 |
|                      | <i>Non-regional lymph node</i> | 4 ( 0.6)       | 8 ( 2.7)          | 5 ( 8.5)        | 0.0002  |
|                      | <i>Peritoneum</i>              | 4 ( 0.6)       | 10 ( 3.4)         | 5 ( 8.5)        | <0.0001 |
|                      | <i>Local</i>                   | 3 ( 0.5)       | 7 ( 2.4)          | 1 ( 1.7)        | 0.0271  |
| <b>Second cancer</b> |                                | 64 (10.0)      | 21 ( 7.1)         | 2 ( 3.4)        | 0.1310  |

DR, desmoplastic reaction

**Supplemental Table 3. Multivariate analyses for RFS as sensitivity analysis**

| Parameter                | Category          | Selected prognostic factors |         | Full prognostic factors** |         |
|--------------------------|-------------------|-----------------------------|---------|---------------------------|---------|
|                          |                   | (N = 991)                   |         | (N = 916)                 |         |
|                          |                   | HR (95% CI)                 | P value | HR (95% CI)               | P value |
| Sex                      | Female            |                             |         | 1                         |         |
|                          | Male              |                             |         | 1.21 [0.85–1.72]          | 0.2912  |
| Age (average; years)     | ≤70               |                             |         | 1                         |         |
|                          | 71–80             |                             |         | 1.41 [1.00–2.00]          | 0.0488  |
| Tumor location           | Right-sided colon |                             |         | 1                         |         |
|                          | Left-sided colon  |                             |         | 1.02 [0.70–1.48]          | 0.9300  |
|                          | Rectosigmoid      |                             |         | 1.07 [0.67–1.71]          | 0.7694  |
| Extent of LN dissection* | D3                |                             |         | 1                         |         |
|                          | D1, D2            |                             |         | 1.51 [1.02–2.24]          | 0.0380  |
| No. of LN examined       | ≥12               | 1                           |         | 1                         |         |
|                          | <12               | 1.27 [0.90–1.80]            | 0.1715  | 1.11 [0.76–1.63]          | 0.5995  |
| Tumor differentiation    | G1                | 1                           |         | 1                         |         |
|                          | G2                | 1.15 [0.83–1.60]            | 0.3914  | 1.08 [0.76–1.52]          | 0.6762  |
|                          | G3                | 0.39 [0.12–1.26]            | 0.1162  | 0.70 [0.21–2.38]          | 0.5650  |
| T-stage                  | T3                | 1                           |         | 1                         |         |
|                          | T4                | 2.14 [1.51–3.04]            | <.0001  | 2.19 [1.52–3.16]          | <.0001  |
| Lymphatic invasion       | Negative          | 1                           |         | 1                         |         |
|                          | Positive          | 0.92 [0.66–1.27]            | 0.5980  | 0.97 [0.68–1.37]          | 0.8391  |
| Venous invasion          | Negative          | 1                           |         | 1                         |         |
|                          | Positive          | 1.15 [0.82–1.62]            | 0.4210  | 1.04 [0.72–1.49]          | 0.8499  |
| Preoperative CEA (ng/ml) | ≤5.0              |                             |         | 1                         |         |
|                          | >5.0              |                             |         | 1.38 [0.98–1.96]          | 0.0672  |
| MSI                      | MSI-Low, MSS      |                             |         | 1                         |         |
|                          | MSI-High          |                             |         | 0.34 [0.10–1.14]          | 0.0801  |
| Treatment arm            | Surgery-alone     | 1                           |         | 1                         |         |
|                          | UFT               | 0.84 [0.62–1.16]            | 0.2872  | 0.91 [0.65–1.27]          | 0.5821  |
| Tumor budding            | BD1               | 1                           |         | 1                         |         |
|                          | BD2               | 1.27 [0.82–1.97]            | 0.2884  | 1.34 [0.84–2.13]          | 0.2195  |
|                          | BD3               | 1.81 [1.15–2.85]            | 0.0102  | 1.98 [1.23–3.19]          | 0.0049  |
| DR pattern               | Mature            | 1                           |         | 1                         |         |
|                          | Intermediate      | 1.85 [1.28–2.67]            | 0.0011  | 1.76 [1.19–2.59]          | 0.0046  |
|                          | Immature          | 2.21 [1.25–3.89]            | 0.0063  | 2.15 [1.20–3.84]          | 0.0096  |

RFS, relapse-free survival; LN, lymph node; CEA, carcinoembryonic antigen; MSI, microsatellite instability; MSS, microsatellite stable; UFT, tegafur–uracil; DR, desmoplastic reaction; HR, hazard ratio; CI, confidence interval; \*Japanese Classification of Colorectal Carcinoma (Second English Edition); \*\*Patients with CEA and MSI values were analyzed.
